# Supplementary material for: Analytical parameters and validation of homopolymer detection in a pyrosequencing-based next generation sequencing system
Source: PubMed Central journal article supplement (PMC5822529; doi:10.1186/s12864-018-4544-x), 2018-02-21

Supplementary figure 2.

Representative Sanger electropherograms of all the HP-containing exons of the CFTR gene

50615\_CFTR\_e1

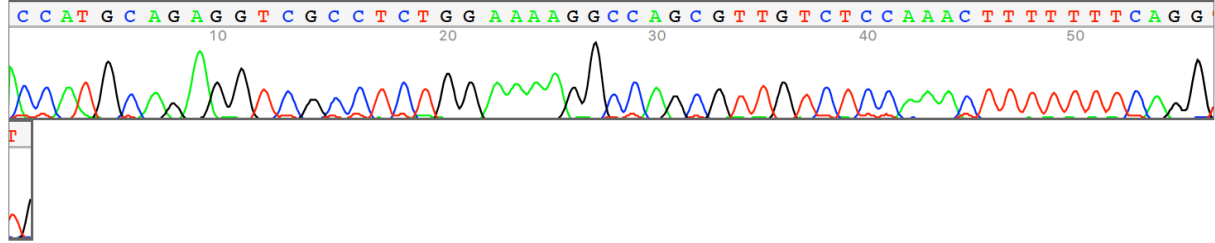

50615\_CFTR\_e2

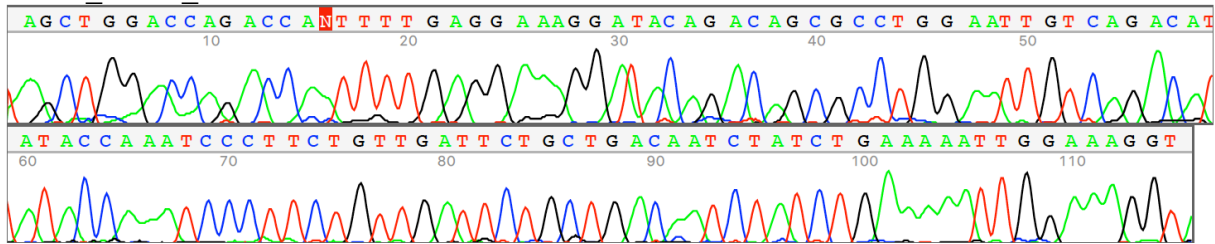

50615 CFTR e3

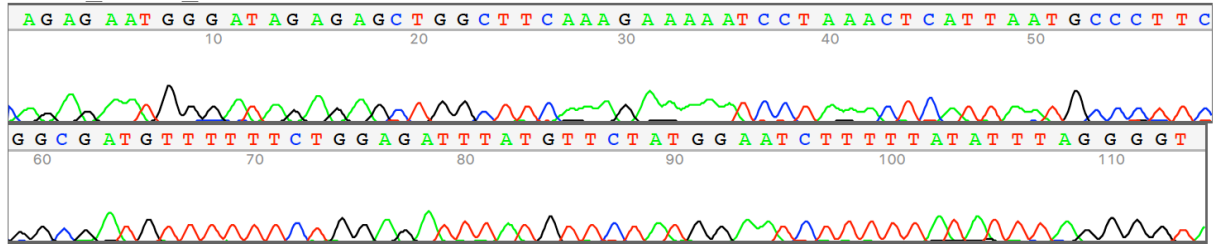

50615 CFTR e4

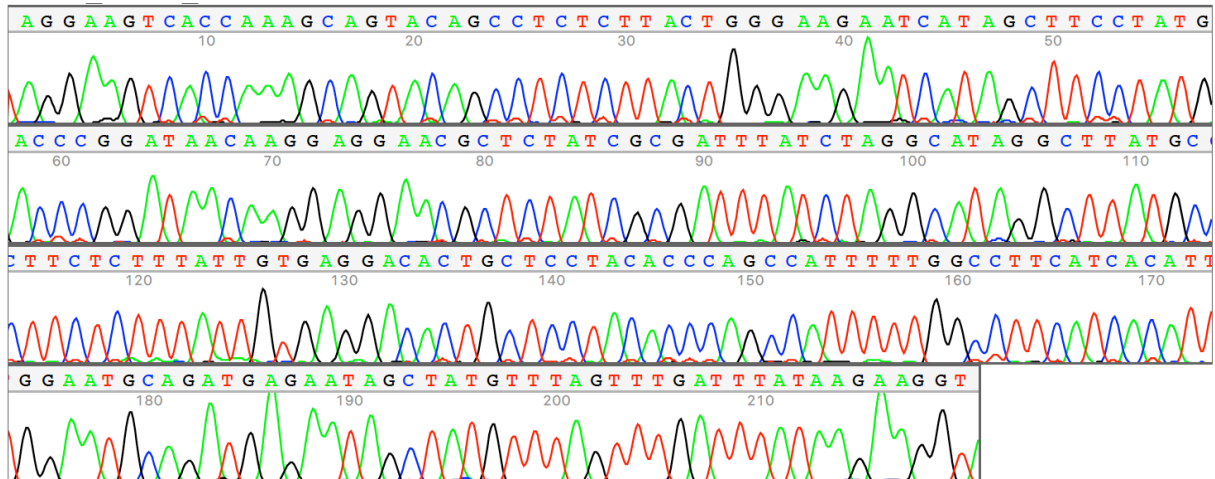

50615\_CFTR\_e6

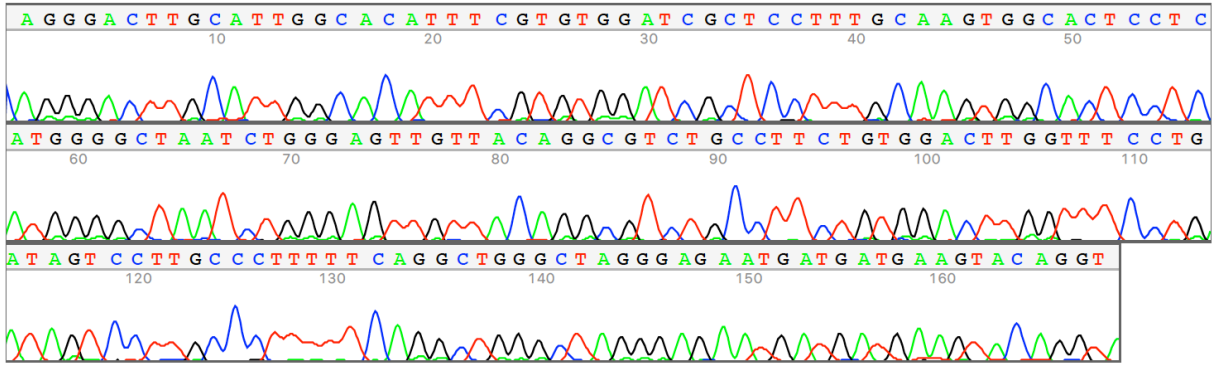

50615 CFTR e7

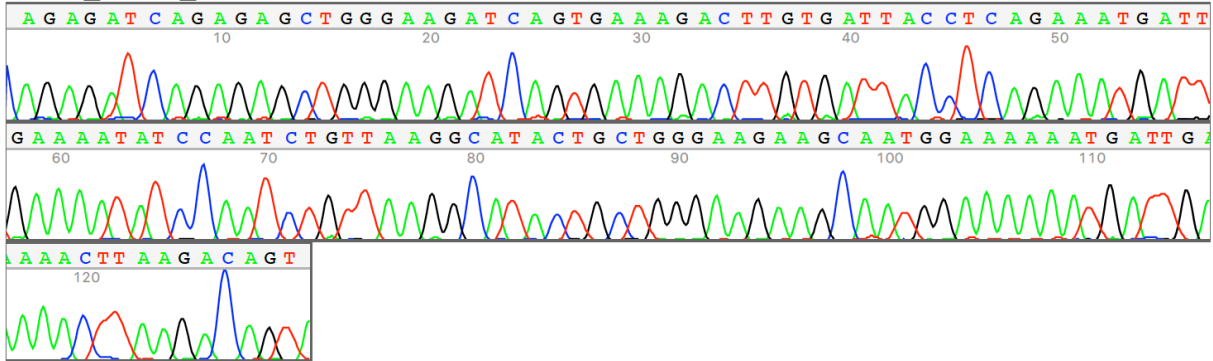

50615 CFTR e8

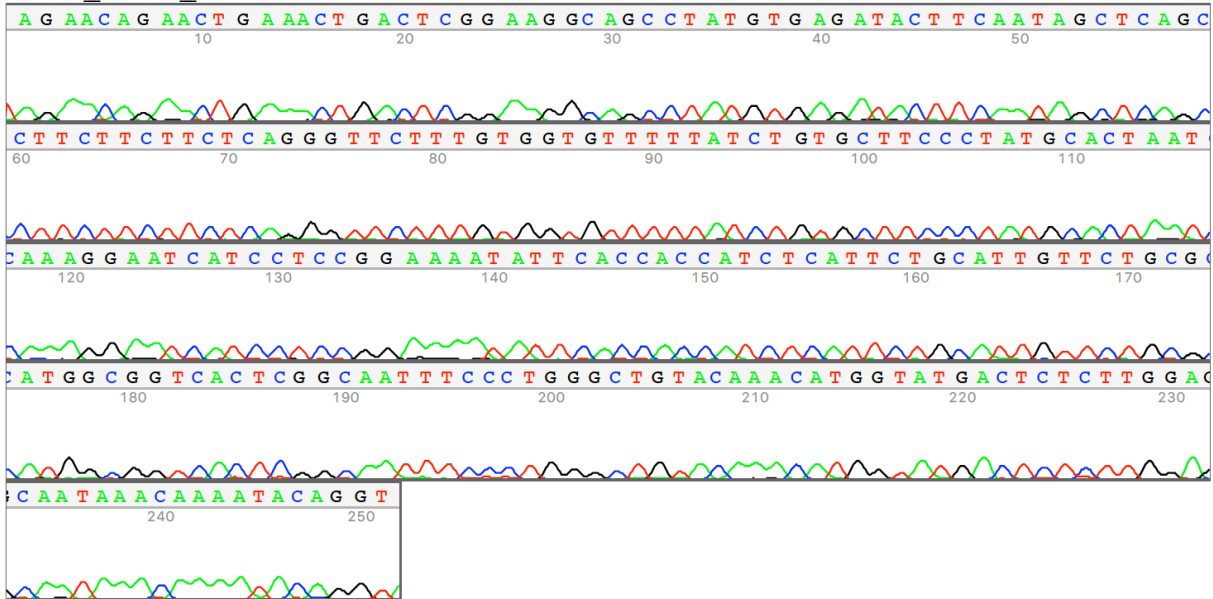

50615 CFTR e10

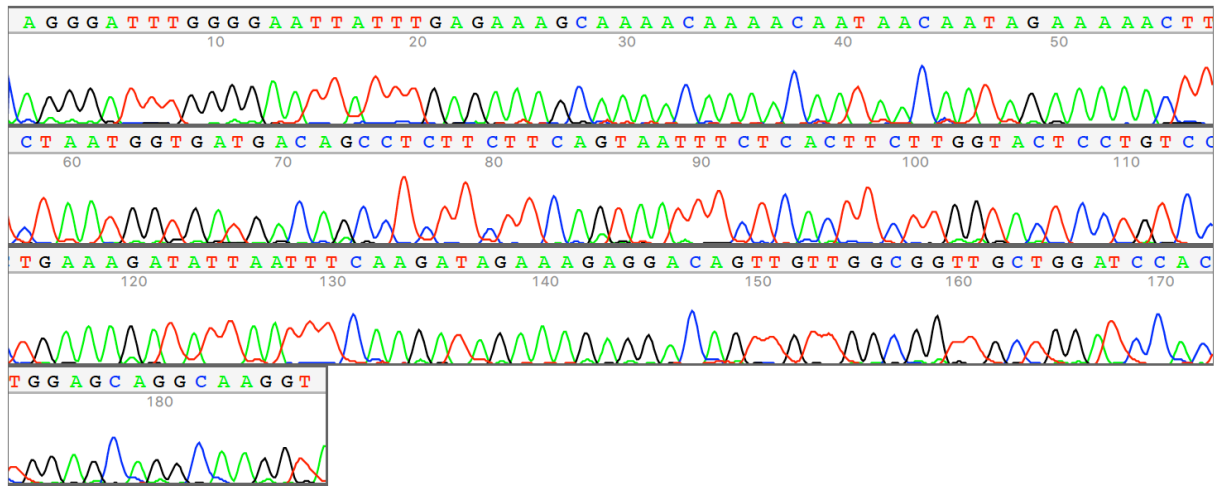

50615 CFTR e13

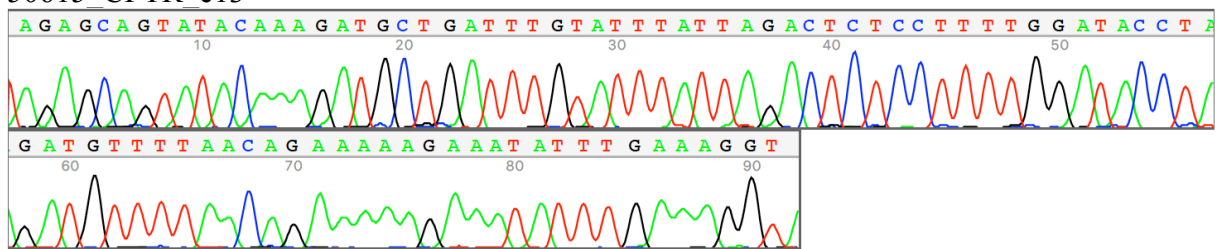

50615 CFTR e14

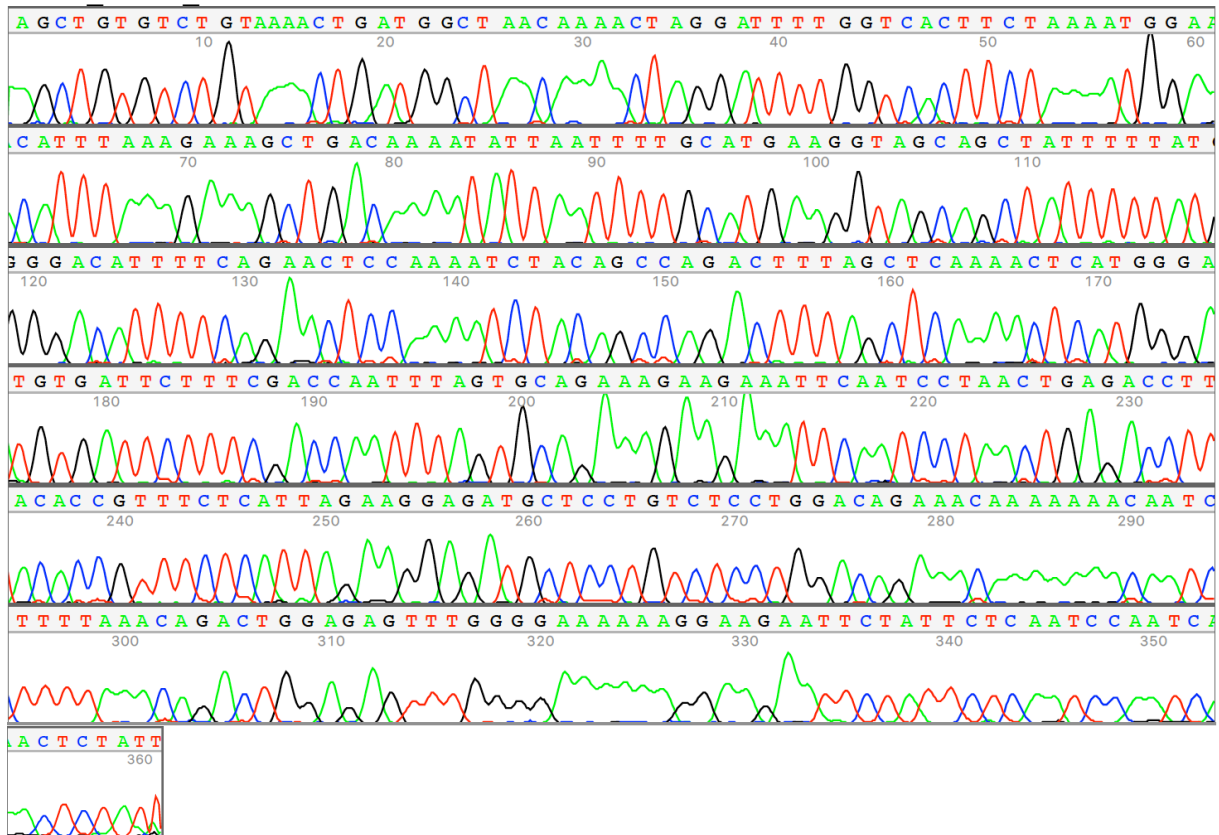

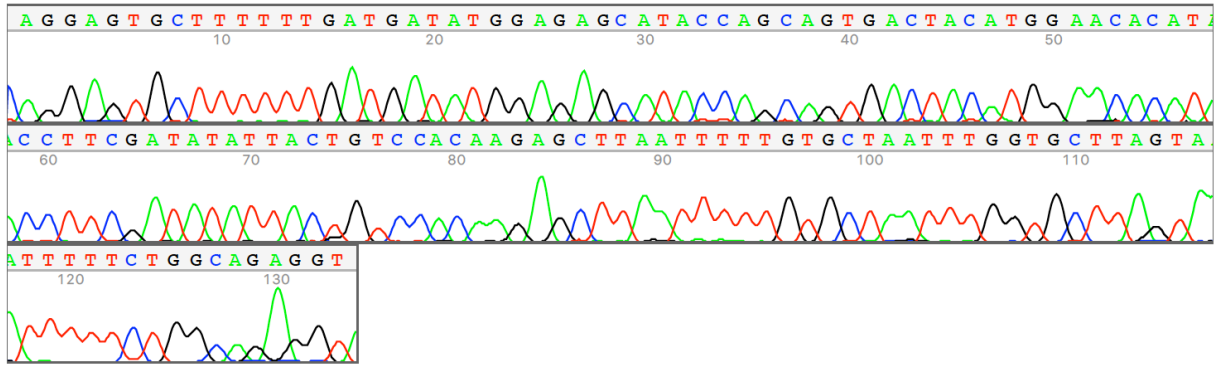

50615\_CFTR\_e20

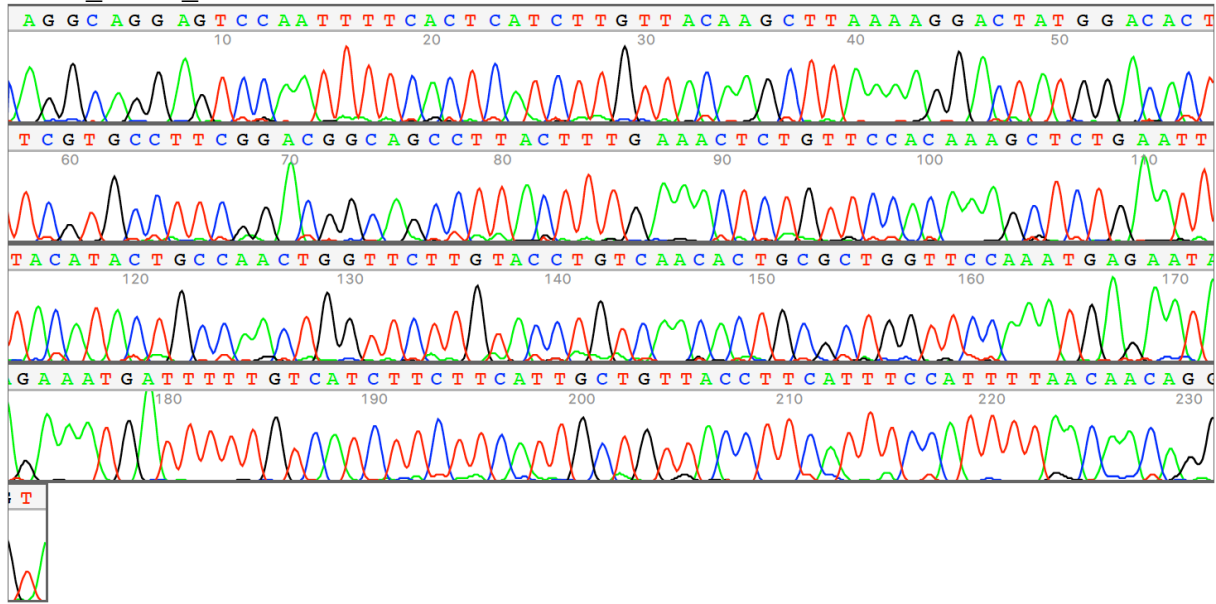

50615\_CFTR\_e22

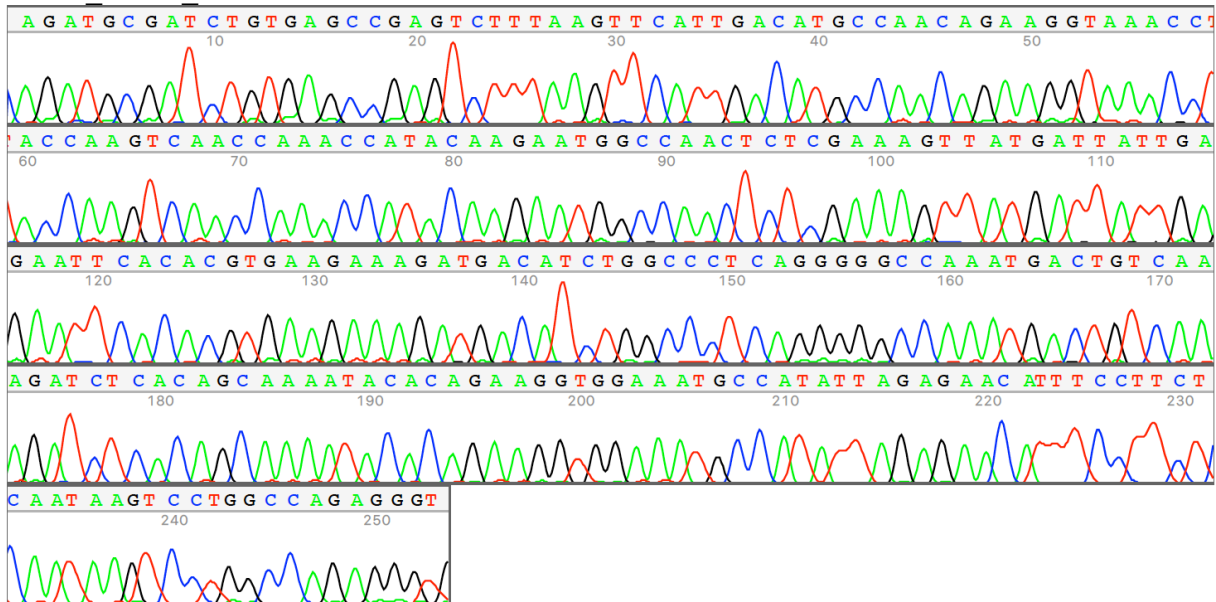

50615\_CFTR\_e23

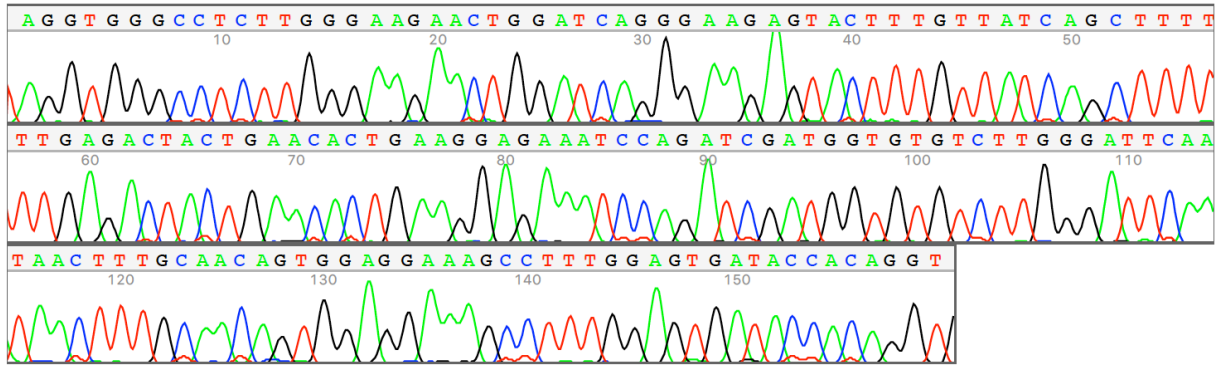

50615 CFTR e24

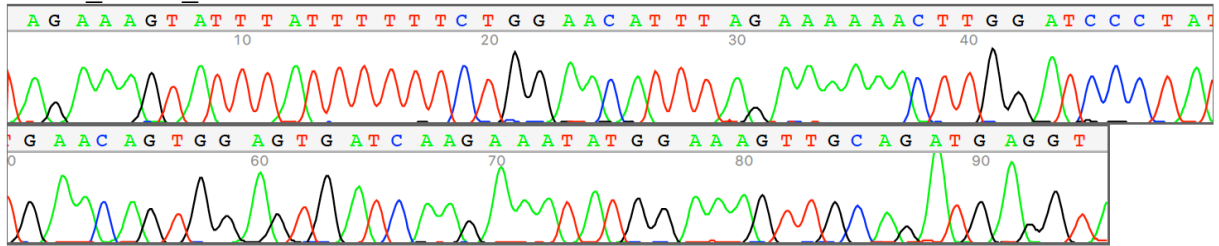

50615 CFTR e25

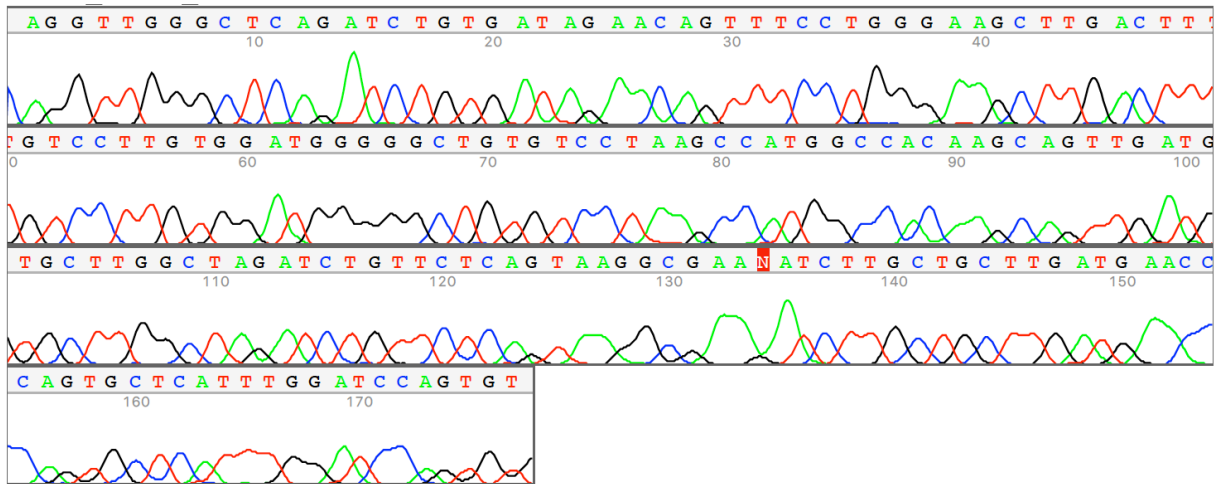

50615 CFTR e26

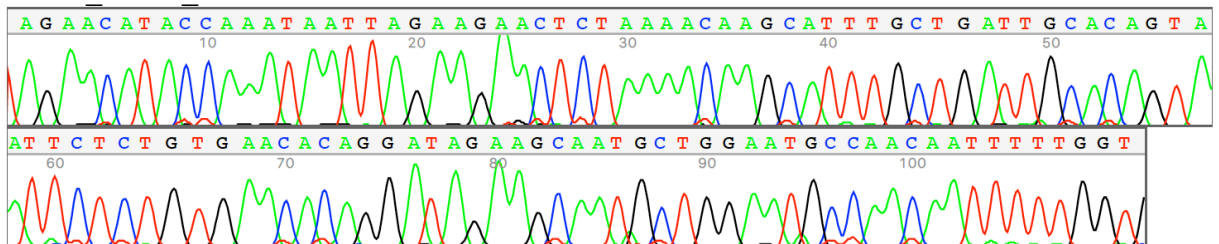

Supplement: 12864_2018_4544_MOESM3_ESM.pdf [file 12864_2018_4544_MOESM3_ESM.pdf]
