# Supplementary material for: Analytical parameters and validation of homopolymer detection in a pyrosequencing-based next generation sequencing system
Source: PubMed Central journal article supplement (PMC5822529; doi:10.1186/s12864-018-4544-x), 2018-02-21

# Supplementary figure 1.

Representative Sanger electropherograms of the generated homopolymers

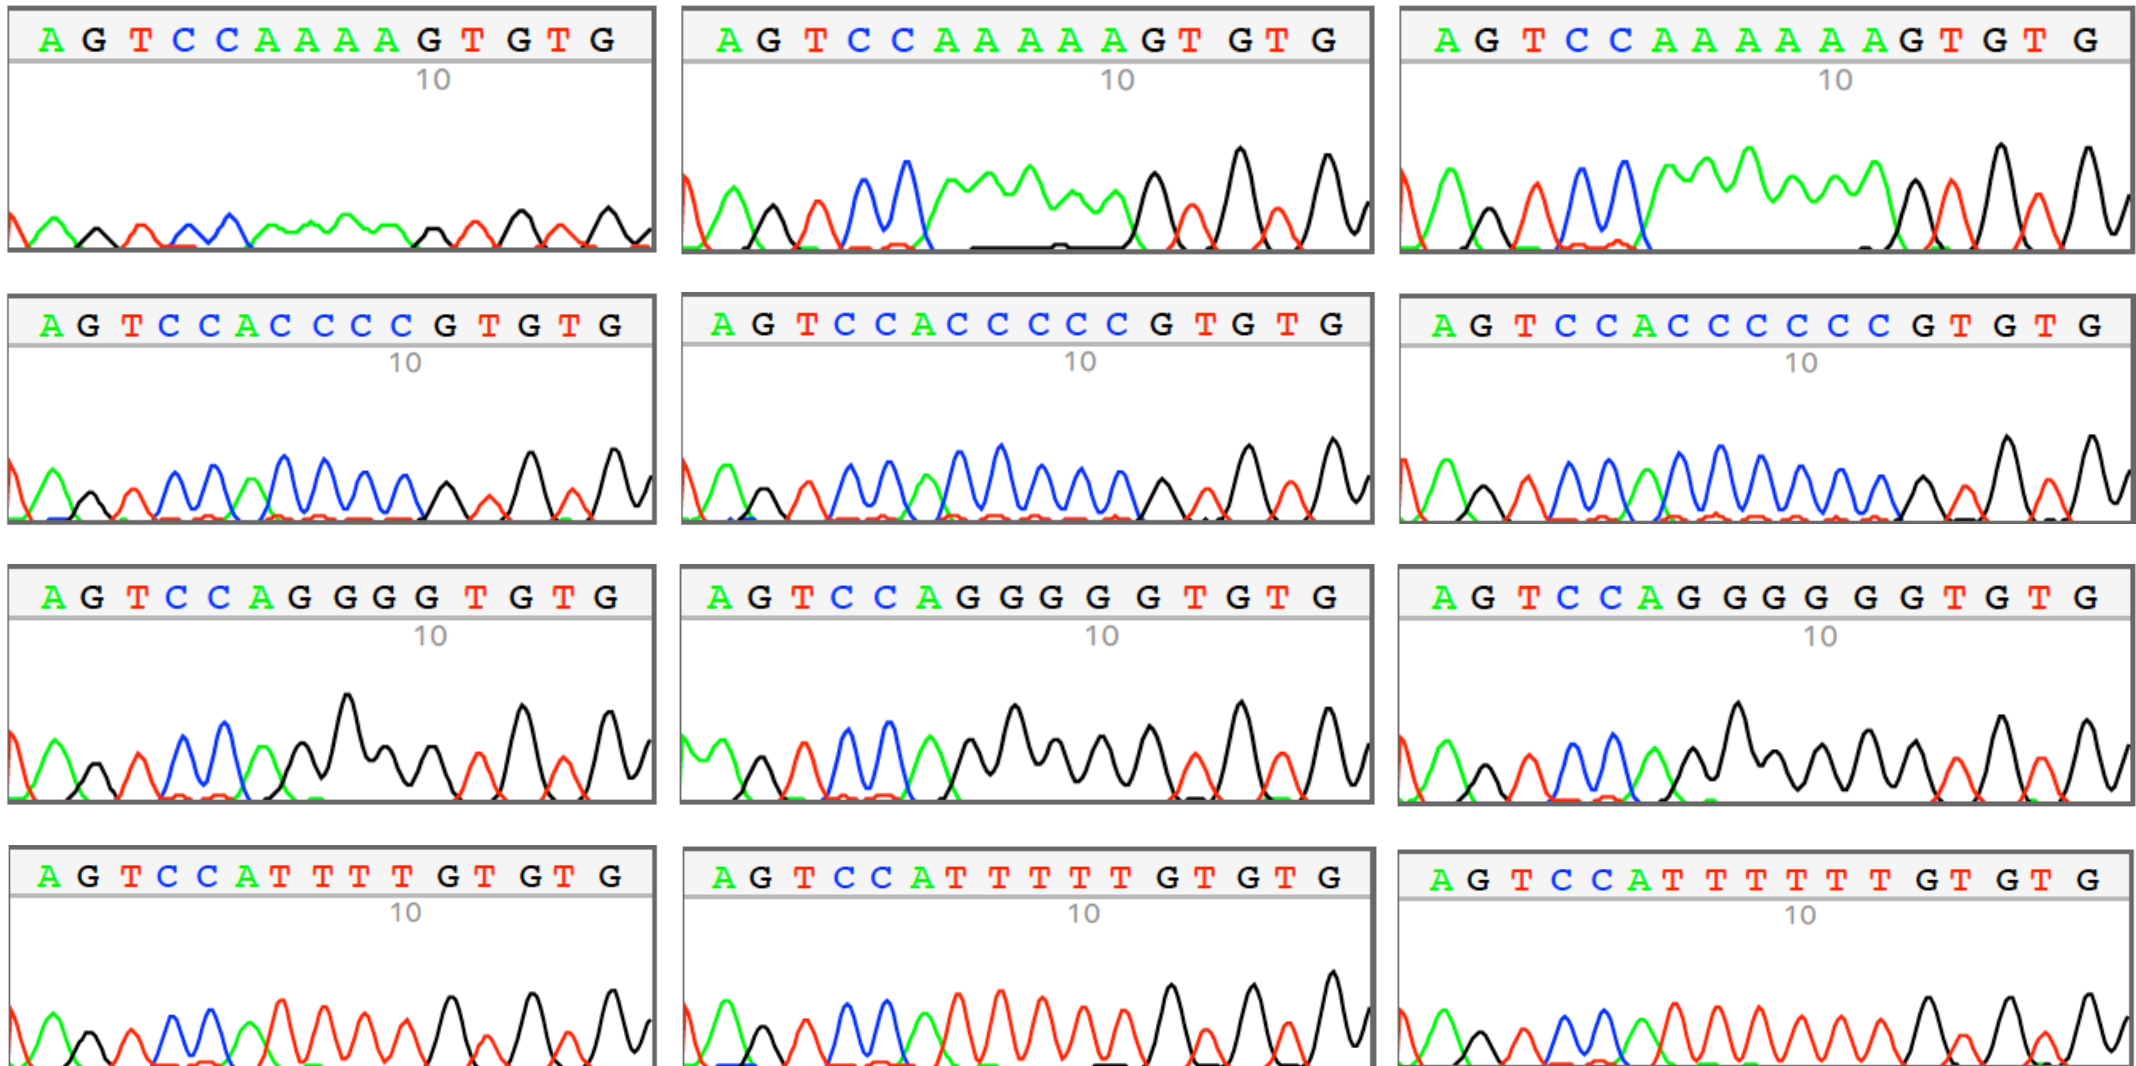

Supplement: 12864_2018_4544_MOESM1_ESM.pdf [file 12864_2018_4544_MOESM1_ESM.pdf]
