# Supplementary material for: Analytical parameters and validation of homopolymer detection in a pyrosequencing-based next generation sequencing system
Source: PubMed Central journal article supplement (PMC5822529; doi:10.1186/s12864-018-4544-x), 2018-02-21

Supplementary figure 3.

Representative Sanger electropherogram of the 2184insA mutation in the CFTR gene

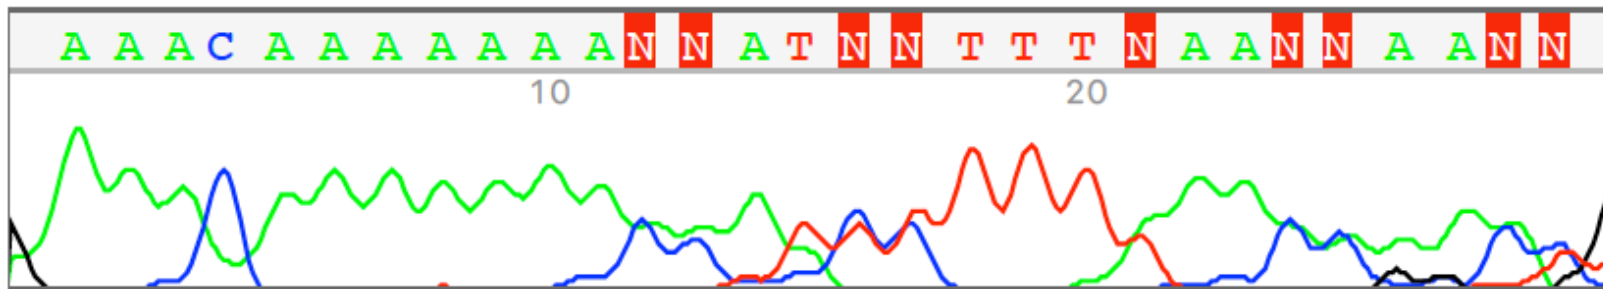

Supplement: 12864_2018_4544_MOESM4_ESM.pdf [file 12864_2018_4544_MOESM4_ESM.pdf]
